# Supplementary material
Source: PubMed Central journal article supplement (PMC7907858)
Supplement: bcr-2020-240242supp001.pdf [file bcr-2020-240242supp001.pdf]

**Supplementary Table 1:** Serum electrophoresis, serum-free light chain assay, anti-MAG levels and full blood count

|                                 | <b>April 2019</b> | <b>July 2019</b> | <b>January 2020</b> | <b>April 2020</b> | <b>June 2020</b> |
|---------------------------------|-------------------|------------------|---------------------|-------------------|------------------|
| WBC ( $10^9$ /L)                | 7.2               |                  |                     | 4.5               | 5.2              |
| Hb (g/L)                        | 146               |                  |                     | 132               | 134              |
| Sodium (mmol/L)                 | 139               |                  |                     | 140               | 141              |
| Potassium (mmol/L)              | 5.3               |                  |                     | 4.5               | 4.0              |
| Urea (mmol/L)                   | 7.0               |                  |                     | 7.1               | 7.2              |
| Creatinine (mmol/L)             | 73                |                  |                     | 84                | 87               |
| TSH (mU/L)                      | 1.16              |                  | 0.03                |                   |                  |
| Free thyroxin (8-21 pmol/L)     |                   |                  | 16                  |                   |                  |
| Calcitonin (ng/L)               |                   | <b>842</b>       | <b>155</b>          | <b>149</b>        |                  |
| Anti-MAG (0-1000 BTU)           |                   | <b>135, 631</b>  |                     | <b>89 451</b>     |                  |
| Serum electrophoresis           |                   |                  |                     |                   |                  |
| IgG                             | 9.3               | 7.7              |                     | 3.31              | 3.31             |
| IgA                             | 2.71              | 2.28             |                     | 2.17              | 6.2              |
| IgM (0.50-2 g/L)                | <b>4.46</b>       | <b>3.63</b>      |                     | <b>3.31</b>       | <b>3.2</b>       |
| Total Paraprotein               | <b>6.9</b>        | <b>5.8</b>       |                     | <b>6.2</b>        | <b>6.2</b>       |
| Gamma protein 1 (< 0.0 g/L)     | <b>3.3</b>        | <b>2.8</b>       |                     | <b>3.2</b>        | <b>3.2</b>       |
| Beta-2 Paraprotein (< 0.0 g/L)  | <b>3.6</b>        | <b>3.0</b>       |                     | <b>2.9</b>        | <b>3.0</b>       |
| Serum free-light chain assay    |                   |                  |                     |                   |                  |
| Free kappa (6.7-22.4 mg/L)      |                   | 19.1             |                     |                   |                  |
| Free lambda (8.3-27.0 mg/L)     |                   | 14.4             |                     |                   |                  |
| Kappa/lambda ratio              |                   | 1.33             |                     |                   |                  |
| B2 microglobulin (1.2-2.4 mg/L) |                   | 1.9              |                     |                   |                  |
